# Supplementary material
Source: PubMed Central journal article supplement (PMC3330684)

**Table S1** Locations of populations of four species sampled, number of each chlorotype and mitotype per population, and estimates of gene diversity for chlorotypes ( $H_C$ ) and mitotypes ( $H_M$ ) within populations.

| Population                                 | Lat. (N)         | Long. (E) | Alt. (m) | N   | Chlorotype |    |    |    |    |    |    |    |    |     |     |     |     | $H_C$ | Mitotype |    |    |    |    |    | $H_M$ |   |      |   |
|--------------------------------------------|------------------|-----------|----------|-----|------------|----|----|----|----|----|----|----|----|-----|-----|-----|-----|-------|----------|----|----|----|----|----|-------|---|------|---|
|                                            |                  |           |          |     | C1         | C2 | C3 | C4 | C5 | C6 | C7 | C8 | C9 | C10 | C11 | C12 | C13 |       | M1       | M2 | M3 | M4 | M5 | M6 |       |   |      |   |
| <i>P. sylvestris</i> var. <i>mongolica</i> |                  |           |          |     |            |    |    |    |    |    |    |    |    |     |     |     |     |       |          |    |    |    |    |    |       |   |      |   |
| 1#                                         | Honghuaerji IM   | 48°05'    | 119°48'  | 904 | 12         | 11 | 0  | 0  | 0  | 0  | 0  | 1  | 0  | 0   | 0   | 0   | 0   | 0     | 0.17     | 12 | 0  | 0  | 0  | 0  | 0     | 0 | 0    | 0 |
| 2#                                         | Hailaer IM       | 48°46'    | 119°43'  | 629 | 12         | 11 | 0  | 0  | 1  | 0  | 0  | 0  | 0  | 0   | 0   | 0   | 0   | 0     | 0.17     | 12 | 0  | 0  | 0  | 0  | 0     | 0 | 0    | 0 |
| 3#                                         | Yakeshi IM       | 49°05'    | 121°10'  | 750 | 12         | 12 | 0  | 0  | 0  | 0  | 0  | 0  | 0  | 0   | 0   | 0   | 0   | 0     | 0        | 12 | 0  | 0  | 0  | 0  | 0     | 0 | 0    | 0 |
| 4#                                         | Eerguna IM       | 51°17'    | 120°53'  | 823 | 12         | 10 | 0  | 2  | 0  | 0  | 0  | 0  | 0  | 0   | 0   | 0   | 0   | 0     | 0.30     | 12 | 0  | 0  | 0  | 0  | 0     | 0 | 0    | 0 |
| 5                                          | Jinhezhen IM     | 50°57'    | 121°51'  | 760 | 12         | 12 | 0  | 0  | 0  | 0  | 0  | 0  | 0  | 0   | 0   | 0   | 0   | 0     | 0        | 12 | 0  | 0  | 0  | 0  | 0     | 0 | 0    | 0 |
| 6                                          | Aokeliduishan IM | 51°48'    | 121°59'  | 842 | 12         | 12 | 0  | 0  | 0  | 0  | 0  | 0  | 0  | 0   | 0   | 0   | 0   | 0     | 0        | 12 | 0  | 0  | 0  | 0  | 0     | 0 | 0    | 0 |
| 7                                          | Genhe IM         | 51°48'    | 121°24'  | 742 | 12         | 11 | 1  | 0  | 0  | 0  | 0  | 0  | 0  | 0   | 0   | 0   | 0   | 0     | 0.17     | 12 | 0  | 0  | 0  | 0  | 0     | 0 | 0    | 0 |
| 8                                          | Manguizhen IM    | 52°00'    | 121°46'  | 642 | 12         | 10 | 2  | 0  | 0  | 0  | 0  | 0  | 0  | 0   | 0   | 0   | 0   | 0     | 0.30     | 12 | 0  | 0  | 0  | 0  | 0     | 0 | 0    | 0 |
| 9                                          | I-H bianjie      | 52°22'    | 122°08'  | 862 | 12         | 12 | 0  | 0  | 0  | 0  | 0  | 0  | 0  | 0   | 0   | 0   | 0   | 0     | 0        | 12 | 0  | 0  | 0  | 0  | 0     | 0 | 0    | 0 |
| 10                                         | Chaohe HLJ       | 52°41'    | 122°39'  | 526 | 12         | 12 | 0  | 0  | 0  | 0  | 0  | 0  | 0  | 0   | 0   | 0   | 0   | 0     | 0        | 12 | 0  | 0  | 0  | 0  | 0     | 0 | 0    | 0 |
| 11                                         | Mohe HLJ         | 53°03'    | 122°22'  | 496 | 12         | 12 | 0  | 0  | 0  | 0  | 0  | 0  | 0  | 0   | 0   | 0   | 0   | 0     | 0        | 12 | 0  | 0  | 0  | 0  | 0     | 0 | 0    | 0 |
| 12#                                        | Amuerzhen HLJ    | 52°54'    | 123°07'  | 609 | 12         | 11 | 0  | 0  | 1  | 0  | 0  | 0  | 0  | 0   | 0   | 0   | 0   | 0     | 0.17     | 12 | 0  | 0  | 0  | 0  | 0     | 0 | 0    | 0 |
| 13                                         | Tahe HLJ         | 52°42'    | 123°55'  | 424 | 12         | 12 | 0  | 0  | 0  | 0  | 0  | 0  | 0  | 0   | 0   | 0   | 0   | 0     | 0        | 12 | 0  | 0  | 0  | 0  | 0     | 0 | 0    | 0 |
| 14                                         | Yongqing HLJ     | 52°26'    | 125°15'  | 317 | 12         | 12 | 0  | 0  | 0  | 0  | 0  | 0  | 0  | 0   | 0   | 0   | 0   | 0     | 0        | 12 | 0  | 0  | 0  | 0  | 0     | 0 | 0    | 0 |
| 15#                                        | Xiushan HLJ      | 52°14'    | 124°41'  | 395 | 12         | 12 | 0  | 0  | 0  | 0  | 0  | 0  | 0  | 0   | 0   | 0   | 0   | 0     | 0        | 12 | 0  | 0  | 0  | 0  | 0     | 0 | 0    | 0 |
| 16                                         | Jiagedaqi HLJ    | 51°37'    | 123°60'  | 627 | 12         | 11 | 0  | 0  | 1  | 0  | 0  | 0  | 0  | 0   | 0   | 0   | 0   | 0     | 0.17     | 12 | 0  | 0  | 0  | 0  | 0     | 0 | 0    | 0 |
| 17                                         | Ganhe IM         | 50°48'    | 123°10'  | 610 | 12         | 10 | 1  | 1  | 0  | 0  | 0  | 0  | 0  | 0   | 0   | 0   | 0   | 0     | 0.32     | 12 | 0  | 0  | 0  | 0  | 0     | 0 | 0    | 0 |
| 18#                                        | Neijiang HLJ     | 49°11'    | 125°32'  | 368 | 12         | 12 | 0  | 0  | 0  | 0  | 0  | 0  | 0  | 0   | 0   | 0   | 0   | 0     | 0        | 12 | 0  | 0  | 0  | 0  | 0     | 0 | 0    | 0 |
| 19                                         | Heihe HLJ        | 50°15'    | 127°30'  | 133 | 10         | 10 | 0  | 0  | 0  | 0  | 0  | 0  | 0  | 0   | 0   | 0   | 0   | 0     | 0        | 10 | 0  | 0  | 0  | 0  | 0     | 0 | 0    | 0 |
| 20                                         | Jidong HLJ       | 45°06'    | 131°15'  | 180 | 8          | 7  | 0  | 0  | 0  | 0  | 1  | 0  | 0  | 0   | 0   | 0   | 0   | 0     | 0.25     | 8  | 0  | 0  | 0  | 0  | 0     | 0 | 0    | 0 |
| 21                                         | Muling HLJ       | 44°54'    | 130°33'  | 277 | 8          | 7  | 0  | 0  | 0  | 0  | 1  | 0  | 0  | 0   | 0   | 0   | 0   | 0     | 0.25     | 8  | 0  | 0  | 0  | 0  | 0     | 0 | 0    | 0 |
| 22                                         | Mulingzhen HLJ   | 44°31'    | 130°16'  | 373 | 5          | 5  | 0  | 0  | 0  | 0  | 0  | 0  | 0  | 0   | 0   | 0   | 0   | 0     | 0        | 4  | 0  | 0  | 0  | 1  | 0     | 0 | 0.40 |   |

|                      |                |        |         |      |     |     |   |   |   |   |   |   |     |   |   |   |   |      |     |    |    |    |    |   |      |  |
|----------------------|----------------|--------|---------|------|-----|-----|---|---|---|---|---|---|-----|---|---|---|---|------|-----|----|----|----|----|---|------|--|
| 23                   | Chaihe HLJ     | 44°45′ | 129°41′ | 310  | 8   | 7   | 0 | 0 | 0 | 1 | 0 | 0 | 0   | 0 | 0 | 0 | 0 | 0.25 | 7   | 0  | 0  | 0  | 0  | 1 | 0.25 |  |
|                      | Subtotal       |        |         |      | 255 | 241 | 4 | 3 | 3 | 1 | 2 | 1 | 0   | 0 | 0 | 0 | 0 |      | 253 | 0  | 0  | 0  | 1  | 1 |      |  |
| <i>P. densiflora</i> |                |        |         |      |     |     |   |   |   |   |   |   |     |   |   |   |   |      |     |    |    |    |    |   |      |  |
| 24#                  | Jidong HLJ     | 45°06′ | 131°15′ | 180  | 8   | 0   | 1 | 0 | 0 | 0 | 0 | 0 | 7   | 0 | 0 | 0 | 0 | 0.25 | 0   | 0  | 8  | 0  | 0  | 0 | 0    |  |
| 25                   | Muling HLJ     | 44°54′ | 130°33′ | 277  | 8   | 1   | 0 | 0 | 0 | 0 | 0 | 0 | 5   | 1 | 1 | 0 | 0 | 0.64 | 0   | 0  | 8  | 0  | 0  | 0 | 0    |  |
| 26                   | Mulingzhen HLJ | 44°31′ | 130°16′ | 373  | 11  | 3   | 0 | 0 | 0 | 0 | 0 | 0 | 8   | 0 | 0 | 0 | 0 | 0.44 | 0   | 0  | 11 | 0  | 0  | 0 | 0    |  |
| 27                   | Chaihe HLJ     | 44°45′ | 129°41′ | 310  | 8   | 2   | 0 | 0 | 0 | 0 | 0 | 0 | 6   | 0 | 0 | 0 | 0 | 0.43 | 0   | 0  | 8  | 0  | 0  | 0 | 0    |  |
| 28                   | Helong JL      | 42°24′ | 128°45′ | 564  | 16  | 1   | 0 | 0 | 0 | 0 | 0 | 0 | 15  | 0 | 0 | 0 | 0 | 0.13 | 0   | 0  | 16 | 0  | 0  | 0 | 0    |  |
| 29#                  | Changbai JL    | 41°26′ | 128°11′ | 1024 | 8   | 0   | 0 | 0 | 0 | 1 | 0 | 0 | 7   | 0 | 0 | 0 | 0 | 0.25 | 0   | 1  | 0  | 7  | 0  | 0 | 0.25 |  |
| 30                   | Linjiang JL    | 41°48′ | 126°54′ | 349  | 7   | 0   | 0 | 0 | 0 | 0 | 0 | 0 | 6   | 1 | 0 | 0 | 0 | 0.29 | 0   | 7  | 0  | 0  | 0  | 0 | 0    |  |
| 31#                  | Tonghua JL     | 41°45′ | 125°59′ | 392  | 7   | 0   | 0 | 0 | 0 | 0 | 0 | 0 | 6   | 1 | 0 | 0 | 0 | 0.29 | 0   | 4  | 0  | 3  | 0  | 0 | 0.57 |  |
| 32                   | Huanren LN     | 41°14′ | 125°23′ | 400  | 8   | 0   | 0 | 0 | 0 | 0 | 0 | 0 | 8   | 0 | 0 | 0 | 0 | 0    | 0   | 8  | 0  | 0  | 0  | 0 | 0    |  |
| 33#                  | Huanren LN     | 41°22′ | 124°56′ | 512  | 8   | 0   | 0 | 0 | 0 | 0 | 0 | 0 | 8   | 0 | 0 | 0 | 0 | 0    | 0   | 8  | 0  | 0  | 0  | 0 | 0    |  |
| 34                   | Benxi LN       | 41°16′ | 123°47′ | 508  | 6   | 0   | 0 | 0 | 0 | 0 | 0 | 0 | 6   | 0 | 0 | 0 | 0 | 0    | 0   | 6  | 0  | 0  | 0  | 0 | 0    |  |
| 35#                  | Fengcheng LN   | 40°25′ | 124°04′ | 176  | 8   | 0   | 0 | 0 | 0 | 0 | 0 | 0 | 7   | 0 | 0 | 1 | 0 | 0.25 | 0   | 8  | 0  | 0  | 0  | 0 | 0    |  |
| 36                   | Dandong LN     | 40°08′ | 124°22′ | 40   | 5   | 0   | 0 | 0 | 0 | 0 | 0 | 0 | 5   | 0 | 0 | 0 | 0 | 0    | 0   | 5  | 0  | 0  | 0  | 0 | 0    |  |
| 37                   | Zhuanghe LN    | 39°41′ | 122°57′ | 15   | 8   | 0   | 0 | 0 | 0 | 0 | 0 | 0 | 8   | 0 | 0 | 0 | 0 | 0    | 0   | 8  | 0  | 0  | 0  | 0 | 0    |  |
| 38                   | Dalian LN      | 38°47′ | 121°09′ | 29   | 8   | 0   | 0 | 0 | 0 | 0 | 0 | 0 | 8   | 0 | 0 | 0 | 0 | 0    | 0   | 8  | 0  | 0  | 0  | 0 | 0    |  |
| 39#                  | Yantai SD      | 37°17′ | 121°44′ | 104  | 11  | 0   | 0 | 0 | 0 | 0 | 0 | 0 | 9   | 2 | 0 | 0 | 0 | 0.33 | 0   | 11 | 0  | 0  | 0  | 0 | 0    |  |
| 40                   | Qingdao SD     | 36°07′ | 120°37′ | 16   | 5   | 0   | 0 | 0 | 0 | 0 | 0 | 0 | 5   | 0 | 0 | 0 | 0 | 0    | 0   | 5  | 0  | 0  | 0  | 0 | 0    |  |
| 41#                  | Lianyungang JS | 34°38′ | 119°15′ | 126  | 8   | 0   | 0 | 0 | 0 | 0 | 0 | 0 | 7   | 1 | 0 | 0 | 0 | 0.25 | 0   | 8  | 0  | 0  | 0  | 0 | 0    |  |
|                      | Subtotal       |        |         |      | 148 | 7   | 1 | 0 | 0 | 1 | 0 | 0 | 131 | 6 | 1 | 1 | 0 | 0    |     | 0  | 87 | 51 | 10 | 0 | 0    |  |
| <i>P. funebris</i>   |                |        |         |      |     |     |   |   |   |   |   |   |     |   |   |   |   |      |     |    |    |    |    |   |      |  |
| 42#                  | Erdao JL       | 42°26′ | 128°07′ | 703  | 22  | 17  | 0 | 0 | 0 | 0 | 0 | 0 | 5   | 0 | 0 | 0 | 0 | 0.37 | 0   | 0  | 0  | 22 | 0  | 0 | 0    |  |
| 43#                  | Baihe JL       | 42°27′ | 128°08′ | 693  | 15  | 5   | 2 | 0 | 2 | 0 | 0 | 0 | 4   | 0 | 0 | 0 | 2 | 0.82 | 0   | 5  | 0  | 10 | 0  | 0 | 0.48 |  |
|                      | Subtotal       |        |         |      | 37  | 22  | 2 | 0 | 2 | 0 | 0 | 0 | 9   | 0 | 0 | 0 | 2 | 0    |     | 0  | 5  | 0  | 32 | 0 | 0    |  |
| <i>P. takahasii</i>  |                |        |         |      |     |     |   |   |   |   |   |   |     |   |   |   |   |      |     |    |    |    |    |   |      |  |
| 44#                  | Xingkaihu HLJ  | 45°18′ | 132°43′ | 72   | 17  | 11  | 0 | 0 | 0 | 0 | 0 | 0 | 6   | 0 | 0 | 0 | 0 | 0.49 | 0   | 1  | 16 | 0  | 0  | 0 | 0.12 |  |

|          |               |        |         |     |     |     |   |   |   |   |   |   |     |   |   |   |   |   |      |     |    |    |    |   |   |   |  |
|----------|---------------|--------|---------|-----|-----|-----|---|---|---|---|---|---|-----|---|---|---|---|---|------|-----|----|----|----|---|---|---|--|
| 45#      | Xingkaihu HLJ | 45°20′ | 132°23′ | 76  | 16  | 10  | 0 | 0 | 0 | 0 | 0 | 0 | 6   | 0 | 0 | 0 | 0 | 0 | 0.50 | 0   | 0  | 16 | 0  | 0 | 0 | 0 |  |
| 46       | Mishan HLJ    | 45°30′ | 132°2′  | 152 | 8   | 1   | 0 | 0 | 0 | 0 | 0 | 0 | 5   | 1 | 0 | 0 | 0 | 1 | 0.68 | 0   | 0  | 8  | 0  | 0 | 0 | 0 |  |
| 47       | Mishan HLJ    | 45°28′ | 131°42′ | 156 | 8   | 4   | 0 | 1 | 0 | 0 | 0 | 0 | 3   | 0 | 0 | 0 | 0 | 0 | 0.64 | 0   | 0  | 8  | 0  | 0 | 0 | 0 |  |
| Subtotal |               |        |         |     | 49  | 26  | 0 | 1 | 0 | 0 | 0 | 0 | 20  | 1 | 0 | 0 | 0 | 1 |      | 0   | 1  | 48 | 0  | 0 | 0 | 0 |  |
| Total    |               |        |         |     | 489 | 296 | 7 | 4 | 5 | 2 | 2 | 1 | 160 | 7 | 1 | 1 | 2 | 1 |      | 253 | 92 | 99 | 43 | 1 | 1 |   |  |

Abbreviations after localities indicate provinces as follows: IM, Inner Mongolica; HLJ, Hei longjiang; JL, Jilin; LN, Liaoning; SD, Shandong; JS, Jiangsu. #, the populations which were also investigated by nuclear loci.

**Table S2** Descriptions of the investigated eight nuclear loci.

| Locus           | Putative function                 | PCR primers (5'-3')                                    | AT | Reference                              |
|-----------------|-----------------------------------|--------------------------------------------------------|----|----------------------------------------|
| <i>a3ip2</i>    | ABI3-interacting protein 2        | F: AATGCCAGGTTGGTGTTA<br>R: CAGCCTCAATTTGCTTTCC        | 60 | Wachowiak <i>et al.</i> , 2009         |
| <i>ccoamt</i>   | Lignin biosynthesis               | F: GCAGCAGAAGTGAAGGCTCAGA<br>R: TCTTTCCATCATCGGGCAATG  | 58 | Gonzalez-Martinez <i>et al.</i> , 2006 |
| <i>pod</i>      | Peroxidase                        | F: CCGATGCTGACTCTTCTAAC<br>R: AGCGAATTTGGAGGATGA       | 55 | Ma <i>et al.</i> , 2006                |
| <i>c3h-1</i>    | Coumarate 3-hydroxylase           | F: AGCGAATTTGGAGGATGA<br>R: TGGGTCCTTCCATACAGC         | 60 | Brown <i>et al.</i> , 2004             |
| <i>CesA2</i>    | Cellulose synthase                | F: AGATCTTGCTCAATGCCTCG<br>R: CCAAACCTTCACTGTCACATCG   | 58 | Brown <i>et al.</i> , 2004             |
| <i>dhn1</i>     | Dehydrin 1 protein                | F: TCACCGCACCCACAGTTC<br>R: TCCGTCGGCTCACATTCA         | 60 | Wachowiak <i>et al.</i> , 2009         |
| <i>erd3</i>     | Early responsive to dehydration 3 | F: GAACGGGTCCGTACATTTTCTG<br>R: TGCCAGATTGATTGGCATAGAA | 60 | Eveno <i>et al.</i> , 2008             |
| <i>aqua-MIP</i> | Putative aquaporin                | F: TGTCAGTCCAGAGCTATTC<br>R: ATCACAGCCGCTCCAAAAC       | 60 | Gonzalez-Martinez <i>et al.</i> , 2006 |

AT, Annealing temperature.

Reference:

- Brown GR, Gill GP, Kuntz RJ, Langley CH, Neale DB (2004). Nucleotide diversity and linkage disequilibrium in loblolly pine. *Proc Natl Acad Sci USA* **101**: 15255–15260.
- Eveno E, Collada C, Guevara MA, Léger V, Soto A, Díaz L *et al.* (2008). Contrasting patterns of selection at *Pinus pinaster* Ait. drought stress candidate genes as revealed by genetic differentiation analyses. *Mol Biol Evol* **25**: 417–437.
- Gonzalez-Martinez SC, Ersoz E, Brown GR, Wheeler NC, Neale DB (2006). DNA sequence variation and selection of tag single nucleotide polymorphisms at candidate genes for drought stress response in *Pinus taeda* L. *Genetics* **72**:1915–1926.
- Ma XF, Szmidi, A.E., Wang XR. (2006). Genetic structure and evolutionary history of a diploid hybrid pine *Pinus densata* inferred from the nucleotide variation at seven gene loci. *Mol Biol Evol* **23**: 807-816.
- Wachowiak W, Balk PA, Savolainen O (2009). Search for nucleotide diversity patterns of local adaptation in dehydrins and other cold-related candidate genes in Scots pine (*Pinus sylvestris* L). *Trees Genet Genomes* **5**: 117–132.

**Table S3** The variable sites in aligned cpDNA and mtDNA sequences which gave rise to thirteen chlorotypes and six mitotypes recorded across the four pine species.

| Chlorotype | Nucleotide variable positions |   |   |                  |   |   |   |             |   |   |   |   |
|------------|-------------------------------|---|---|------------------|---|---|---|-------------|---|---|---|---|
|            | <i>rpl16</i>                  |   |   | <i>trnS-trnG</i> |   |   |   | <i>rbcL</i> |   |   |   |   |
|            | 1                             | 1 | 6 |                  | 2 | 2 | 5 | 7           | 7 | 7 | 1 | 1 |
|            | 4                             | 6 | 6 | 1                | 0 | 3 | 1 | 0           | 3 | 6 | 9 | 1 |
|            | 9                             | 5 | 2 | 2                | 0 | 4 | 7 | 9           | 1 | 5 | 9 | 5 |
| C1         | -                             | * | G | §                | A | A | C | A           | T | T | T | T |
| C2         | -                             | * | T | §                | A | A | C | A           | T | T | T | T |
| C3         | -                             | * | G | §                | G | A | C | A           | T | T | T | T |
| C4         | -                             | * | G | §                | A | C | C | A           | T | T | T | T |
| C5         | -                             | * | G | -                | A | A | C | A           | T | T | T | T |
| C6         | -                             | * | G | §                | A | A | C | G           | T | T | T | G |
| C7         | -                             | * | G | §                | A | A | C | A           | T | G | T | T |
| C8         | -                             | * | G | §                | A | A | C | G           | C | T | C | T |
| C9         | -                             | * | G | -                | A | A | C | G           | C | T | C | T |
| C10        | -                             | * | G | §                | A | A | T | G           | C | T | C | T |
| C11        | #                             | * | G | §                | A | A | C | G           | C | T | C | T |
| C12        | -                             | * | T | -                | A | A | C | A           | T | T | T | T |
| C13        | -                             | - | G | §                | A | A | C | G           | C | T | C | T |

| Mitotype | Nucleotide variable positions |   |   |   |   |                 |   |   |                      |   |   |   |   |   |   |                      |   |   |   |   |   |   |
|----------|-------------------------------|---|---|---|---|-----------------|---|---|----------------------|---|---|---|---|---|---|----------------------|---|---|---|---|---|---|
|          | <i>nad5</i>                   |   |   |   |   | <i>nad4/3-4</i> |   |   | <i>nad1</i> exon B/C |   |   |   |   |   |   | <i>nad7</i> intron 1 |   |   |   |   |   |   |
|          | 1                             | 2 | 2 | 3 | 3 | 4               | 5 | 1 | 2                    | 2 | 7 | 8 | 8 | 8 | 8 | 9                    | 1 | 1 | 5 | 5 | 6 | 8 |
|          | 9                             | 6 | 7 | 4 | 4 | 6               | 9 | 6 | 8                    | 8 | 8 | 2 | 2 | 8 | 9 | 1                    | 1 | 8 | 4 | 4 | 7 | 5 |
|          | 2                             | 9 | 3 | 0 | 4 | 2               | 5 | 4 | 0                    | 4 | 1 | 2 | 5 | 6 | 4 | 9                    | 1 | 7 | 6 | 9 | 5 | 0 |
| M1       | G                             | - | - | - | A | A               | □ | - | -                    | □ | C | ○ | C | G | C | □                    | ■ | C | □ | - | - | C |

|    |   |       |       |   |   |   |       |   |   |   |   |   |   |   |   |   |   |   |   |
|----|---|-------|-------|---|---|---|-------|---|---|---|---|---|---|---|---|---|---|---|---|
| M2 | - | ATGGC | TGGGT | C | C | ▲ | TGCTC | - | A | ● | - | - | C | ▼ | - | A | □ | □ | C |
| M3 | - | ATGGC | TGGGT | C | C | ▲ | TGCTC | - | A | ● | - | - | C | ▼ | - | A | □ | □ | A |
| M4 | - | ATGGC | TGGGT | C | C | ▲ | TGCTC | - | A | ● | - | - | A | ▼ | - | A | □ | □ | C |
| M5 | G | -     | -     | A | A | □ | -     | - | A | ● | - | - | C | ▼ | - | C | □ | - | C |
| M6 | G | -     | -     | A | A | □ | -     | - | A | ● | - | - | A | ▼ | - | C | □ | - | C |

Dashes indicate missing nucleotides. # ATATTTTGATCTAATG, \* ATAT, § CAG

▲ ATTGGGTGGGGGGGCTTATGGT

□CTTTTTTACTTACTTTAGAGGATGCGTAAGCACGCTCGACTGTTAAGGAGAGGGGCAAATAA  
GTCAAAAAAAGGGT

● GGCCTCC

○ TTTTACTTACTTTAGAGGATGCGTAAGCACGCTCGACTGTTAAGGAGAGGGG

▼ GGGGGTCGAGCGTT

□TCTTCGCGTTCCTCTCTTTTGGGGCCCCTCCCCAAAAGAGAGTTGTTTCGTCTCCTCACA

□ GGGTGGCCCCTCTC

□ TTTTTTTTACTTATTTGGGGGATGCGTAAGCAGGCTCGACTGTTAAGGAGAGGGGC

□ CCGGAGGGCTTGCCTTCTGAGGGCAAGGT

□GATGGCGGCCCTCTCCTAACAGTCGAGTACCTAAAGGTCCTTATGGTTCGAGTACCTAAAGG

T

■CTCCTCTCCCTTGGGGTTCGAGTACCTAAAGGTCCTTATCAGTCGAGCCCCCTAAAGGGTCCT

**Table S4** Estimates of average genetic diversity within populations ( $H_S$ ), total genetic diversity ( $H_T$ ), interpopulation differentiation ( $G_{ST}$ ), and the number of substitution types ( $N_{ST}$ ) (mean  $\pm$  SE in parentheses) for haplotypes (*P. funebris*: not estimated due to less than three populations).

| Regions                                    | $H_S$         | $H_T$         | $G_{ST}$      | $N_{ST}$       |
|--------------------------------------------|---------------|---------------|---------------|----------------|
| Chlorotype                                 |               |               |               |                |
| Four species                               | 0.199 (0.031) | 0.562 (0.025) | 0.645 (0.050) | 0.745 (0.048)* |
| <i>P. sylvestris</i> var. <i>mongolica</i> | 0.109 (0.026) | 0.109 (0.025) | -0.000 (NC)   | 0.014(NC)      |
| <i>P. densiflora</i>                       | 0.196 (0.045) | 0.201 (0.045) | 0.024 (NC)    | 0.032 (NC)     |
| <i>P. takahasii</i>                        | 0.535 (0.073) | 0.607 (0.082) | 0.119 (0.019) | 0.226 (0.150)* |
| <i>P. funebris</i>                         | –             | –             | –             | –              |
| Mitotype                                   |               |               |               |                |
| Four species                               | 0.045 (0.019) | 0.668 (0.044) | 0.933 (0.028) | 0.976 (0.015)* |
| <i>P. sylvestris</i> var. <i>mongolica</i> | 0.028 (0.020) | 0.028 (0.020) | -0.004 (NC)   | -0.006 (NC)    |
| <i>P. densiflora</i>                       | 0.046 (0.034) | 0.522 (0.090) | 0.913 (0.062) | 0.919 (0.055)  |
| <i>P. takahasii</i>                        | 0.029 (0.029) | 0.029 (0.029) | -0.000 (NC)   | 0.000 (NC)     |
| <i>P. funebris</i>                         | –             | –             | –             | –              |

**Table S5** Analysis of molecular variance (AMOVA) of cpDNA and mtDNA variation in four species.

| Source of variation                                                         | d. F. | SS      | VC    | Variation ( % ) | Fixation index         |
|-----------------------------------------------------------------------------|-------|---------|-------|-----------------|------------------------|
| <b>Chlorotype</b>                                                           |       |         |       |                 |                        |
| Among all species                                                           | 3     | 249.86  | 0.820 | 77.08           | $F_{CT} = 0.771^{***}$ |
| Among populations within species                                            | 43    | 12.90   | 0.006 | 0.58            | $F_{SC} = 0.025^*$     |
| Within populations                                                          | 442   | 105.02  | 0.238 | 22.34           | $F_{ST} = 0.777^{***}$ |
| Total                                                                       | 488   | 367.78  | 1.064 |                 |                        |
| Among populations within <i>P. sylvestris</i> var. <i>mongolica</i>         | 22    | 1.70    | 0.001 | 2.39            | $F_{ST} = 0.024^*$     |
| Within populations                                                          | 232   | 14.13   | 0.061 | 97.61           |                        |
| Total                                                                       | 254   | 15.83   | 0.063 |                 |                        |
| Among populations within <i>P. densiflora</i>                               | 17    | 4.67    | 0.005 | 2.13            | $F_{ST} = 0.021$       |
| Within populations                                                          | 130   | 30.33   | 0.233 | 97.87           |                        |
| Total                                                                       | 147   | 35.00   | 0.238 |                 |                        |
| Between <i>P. sylvestris</i> var. <i>mongolica</i> and <i>P. densiflora</i> | 1     | 246.67  | 1.316 | 91.20           | $F_{CT} = 0.912^{***}$ |
| Among populations within species                                            | 39    | 6.38    | 0.004 | 0.29            | $F_{SC} = 0.033$       |
| Within populations                                                          | 342   | 44.46   | 0.123 | 8.51            | $F_{ST} = 0.915^{***}$ |
| Total                                                                       | 402   | 297.51  | 1.443 |                 |                        |
| <b>Mitotype</b>                                                             |       |         |       |                 |                        |
| Among all species                                                           | 3     | 2112.60 | 6.947 | 97.55           | $F_{CT} = 0.976^{***}$ |
| Among populations within species                                            | 43    | 45.49   | 0.097 | 1.36            | $F_{SC} = 0.555^{***}$ |
| Within populations                                                          | 442   | 34.34   | 0.078 | 1.09            | $F_{ST} = 0.989^{***}$ |
| Total                                                                       | 488   | 2192.43 | 7.122 |                 |                        |
| Among populations within <i>P. sylvestris</i> var. <i>mongolica</i>         | 22    | 2.29    | 0.005 | 7.62            | $F_{ST} = 0.076^*$     |
| Within populations                                                          | 232   | 12.60   | 0.054 | 92.38           |                        |
| Total                                                                       | 254   | 14.89   | 0.059 |                 |                        |



|                                                                             |     |         |       |       |                        |
|-----------------------------------------------------------------------------|-----|---------|-------|-------|------------------------|
| Among populations within <i>P. densiflora</i>                               | 17  | 42.17   | 0.287 | 68.10 | $F_{ST} = 0.681^{***}$ |
| Within populations                                                          | 130 | 17.46   | 0.134 | 31.90 |                        |
| Total                                                                       | 147 | 59.64   | 0.421 |       |                        |
| Between <i>P. sylvestris</i> var. <i>mongolica</i> and <i>P. densiflora</i> | 1   | 1571.90 | 8.387 | 97.78 | $F_{CT} = 0.978^{***}$ |
| Among populations within species                                            | 39  | 44.46   | 0.108 | 1.26  | $F_{SC} = 0.565^{***}$ |
| Within populations                                                          | 362 | 30.06   | 0.083 | 0.97  | $F_{ST} = 0.990^{***}$ |
| Total                                                                       | 402 | 1646.42 | 8.578 |       |                        |

d.f., degrees of freedom; SS, sum of squares; VC, variance components;

\* $P < 0.05$ , \*\* $P < 0.01$  and \*\*\* $P < 0.001$ , 1000 permutations.

$F_{CT}$ , differentiation among groups within four species;

$F_{SC}$ , differentiation among populations within species;

$F_{ST}$ , differentiation among populations within four species

**Table S6** Nucleotide variation at eight nuclear loci in (a) *P. sylvestris* var. *mongolica*, (b) *P. densiflora*, (c) *P. funebris* and (d) *P. takahasii*.

| Species | Locus           | Total |          |                               |          |               |         |                      | Nonsynonymous sites |          |               |         | Silent sites |          |               |         |
|---------|-----------------|-------|----------|-------------------------------|----------|---------------|---------|----------------------|---------------------|----------|---------------|---------|--------------|----------|---------------|---------|
|         |                 | n     | <i>L</i> | <i>N<sub>h</sub></i> (Indels) | <i>S</i> | $\theta_{wt}$ | $\pi t$ | <i>R<sub>m</sub></i> | <i>L</i>            | <i>S</i> | $\theta_{wa}$ | $\pi_a$ | <i>L</i>     | <i>S</i> | $\theta_{ws}$ | $\pi_s$ |
| a       | <i>a3ip2</i>    | 26    | 948      | 7                             | 10       | 0.00283       | 0.00325 | 0                    | 143.5               | 0        | 0             | 0       | 780.5        | 10       | 0.00336       | 0.00386 |
|         | <i>ccoaoamt</i> | 26    | 502      | 2                             | 5        | 0.00261       | 0.00091 | 0                    | 197                 | 0        | 0             | 0       | 305          | 5        | 0.0043        | 0.00149 |
|         | <i>pod</i>      | 24    | 365      | 6                             | 10       | 0.00738       | 0.0093  | 0                    | 88.69               | 0        | 0             | 0       | 274.31       | 10       | 0.00976       | 0.01231 |
|         | <i>c3h-1</i>    | 27    | 676      | 5                             | 8        | 0.0031        | 0.00287 | 0                    | 245.44              | 1        | 0.00106       | 0.00146 | 422.56       | 7        | 0.0043        | 0.0037  |
|         | <i>CesA2</i>    | 21    | 516      | 2                             | 7        | 0.00377       | 0.00129 | 0                    | 286.33              | 0        | 0             | 0       | 229.67       | 7        | 0.00847       | 0.0029  |
|         | <i>dhn1</i>     | 23    | 1076     | 13                            | 53       | 0.01632       | 0.01536 | 5                    | 393.44              | NA       | NA            | 0.00556 | 516.56       | NA       | NA            | 0.02212 |
|         | <i>erd3</i>     | 24    | 774      | 7                             | 8        | 0.00277       | 0.00272 | 1                    | 428.28              | 3        | 0.00188       | 0.0018  | 342.72       | 5        | 0.00391       | 0.00364 |
|         | <i>aqua-MIP</i> | 13    | 560      | 3                             | 11       | 0.00633       | 0.00568 | 0                    | 148.67              | 0        | 0             | 0       | 411.33       | 11       | 0.00862       | 0.00773 |
|         | Total           | —     | 5417     | 45                            | 112      | —             | —       | 6                    | 1931.35             | 4        | —             | —       | 3282.65      | 44       | —             | —       |
|         | Average         | 23    | 677.13   | 5.625                         | 14       | 0.00627       | 0.00579 | 0.75                 | 241.42              | 0.57     | 0.00069       | 0.00172 | 410.33       | 7.8571   | 0.00552       | 0.00759 |
| b       | <i>a3ip2</i>    | 22    | 948      | 3                             | 0        | 0             | 0       | NA                   | 143.5               | 0        | 0             | 0       | 710.5        | 0        | 0             | 0       |
|         | <i>ccoaoamt</i> | 23    | 502      | 9                             | 7        | 0.00379       | 0.0021  | 0                    | 197                 | 1        | 0.00138       | 0.00044 | 304          | 6        | 0.00535       | 0.00317 |
|         | <i>pod</i>      | 17    | 365      | 8                             | 18       | 0.01471       | 0.01334 | 2                    | 88.67               | 1        | 0.00334       | 0.00133 | 274.33       | 18       | 0.01948       | 0.01724 |
|         | <i>c3h-1</i>    | 25    | 676      | 9                             | 14       | 0.00558       | 0.00358 | 2                    | 245.74              | 1        | 0.00108       | 0.00155 | 417.26       | 13       | 0.00825       | 0.00479 |
|         | <i>CesA2</i>    | 26    | 516      | 6                             | 5        | 0.00254       | 0.00265 | 0                    | 286.32              | 0        | 0             | 0       | 229.68       | 5        | 0.0057        | 0.00595 |
|         | <i>dhn1</i>     | 18    | 1117     | 13                            | 47       | 0.0149        | 0.01572 | 7                    | 400.81              | NA       | NA            | 0.00788 | 516.19       | NA       | NA            | 0.02182 |
|         | <i>erd3</i>     | 27    | 774      | 8                             | 7        | 0.00235       | 0.00169 | 1                    | 428.4               | 2        | 0.00121       | 0.00145 | 342.6        | 5        | 0.00379       | 0.00201 |
|         | <i>aqua-MIP</i> | 20    | 560      | 13                            | 15       | 0.00755       | 0.00695 | 4                    | 148.67              | 0        | 0             | 0       | 411.33       | 15       | 0.01028       | 0.00947 |
|         | Total           | —     | 5458     | 61                            | 113      | —             | —       | 16                   | 1939.11             | 5        | —             | —       | 3205.89      | 47       | —             | —       |
|         | Average         | 22.25 | 682.25   | 8.625                         | 14.13    | 0.00642       | 0.00595 | 2.29                 | 242.39              | 0.63     | 0.00088       | 0.00225 | 400.74       | 8.86     | 0.00641       | 0.00777 |
| c       | <i>a3ip2</i>    | 10    | 948      | 5                             | 10       | 0.00404       | 0.00432 | 0                    | 143.5               | 0        | 0             | 0       | 728.5        | 10       | 0.00485       | 0.00519 |
|         | <i>ccoaoamt</i> | 11    | 502      | 6                             | 9        | 0.00613       | 0.00581 | 0                    | 197                 | 0        | 0             | 0       | 304          | 9        | 0.01011       | 0.00957 |
|         | <i>pod</i>      | 9     | 365      | 3                             | 10       | 0.01014       | 0.01377 | 0                    | 88.67               | 0        | 0             | 0       | 274.33       | 10       | 0.01341       | 0.01823 |

|   |                 |       |        |      |       |          |         |      |        |      |         |          |        |       |         |         |
|---|-----------------|-------|--------|------|-------|----------|---------|------|--------|------|---------|----------|--------|-------|---------|---------|
|   | <i>c3h-1</i>    | 12    | 676    | 5    | 9     | 0.00449  | 0.00541 | 0    | 245.42 | 1    | 0.00135 | 0.00123  | 417.58 | 8     | 0.00634 | 0.00787 |
|   | <i>CesA2</i>    | 11    | 516    | 6    | 4     | 0.00265  | 0.00324 | 1    | 286.21 | 0    | 0       | 0        | 229.79 | 4     | 0.00594 | 0.00728 |
|   | <i>dhn1</i>     | 7     | 1069   | 5    | 37    | 0.01643  | 0.01383 | 4    | 400.45 | NA   | NA      | 0.0063   | 518.55 | NA    | NA      | 0.01965 |
|   | <i>erd3</i>     | 11    | 774    | 4    | 8     | 0.00353  | 0.00366 | 0    | 428.38 | 4    | 0.00319 | 0.00246  | 342.62 | 4     | 0.00399 | 0.0052  |
|   | <i>aqua-MIP</i> | 11    | 560    | 8    | 17    | 0.01036  | 0.01026 | 2    | 148.67 | 0    | 0       | 0        | 411.33 | 17    | 0.01411 | 0.01397 |
|   | Total           | –     | 5410   | 42   | 104   | –        | –       | 7    | 1938.3 | 5    | –       | –        | 3226.7 | 45    | –       | –       |
|   | Average         | 10.25 | 676.25 | 5.25 | 13    | 0.007598 | 0.00753 | 0.88 | 242.29 | 0.71 | 0.0011  | 0.002001 | 403.34 | 8.86  | 0.00793 | 0.01065 |
| d | <i>a3ip2</i>    | 8     | 948    | 3    | 11    | 0.00485  | 0.00499 | 0    | 143.5  | 0    | 0       | 0        | 728.5  | 11    | 0.00582 | 0.00598 |
|   | <i>ccoamt</i>   | 9     | 502    | 6    | 8     | 0.00588  | 0.0061  | 0    | 197    | 0    | 0       | 0        | 304    | 8     | 0.00968 | 0.01005 |
|   | <i>pod</i>      | 8     | 365    | 7    | 11    | 0.01169  | 0.01328 | 2    | 88.67  | 1    | 0.00435 | 0.00604  | 274.33 | 10    | 0.01406 | 0.01562 |
|   | <i>c3h-1</i>    | 8     | 676    | 5    | 10    | 0.00581  | 0.00737 | 2    | 245.58 | 1    | 0.00157 | 0.00233  | 417.42 | 9     | 0.00832 | 0.01035 |
|   | <i>CesA2</i>    | 9     | 516    | 3    | 3     | 0.00214  | 0.00258 | 0    | 286.33 | 0    | 0       | 0        | 229.67 | 3     | 0.00481 | 0.00581 |
|   | <i>dhn1</i>     | 7     | 1085   | 4    | 32    | 0.01375  | 0.01519 | 3    | 400.98 | 9    | 0.00916 | 0.00962  | 549.02 | 25    | 0.01859 | 0.01925 |
|   | <i>erd3</i>     | 10    | 774    | 6    | 8     | 0.00365  | 0.00388 | 0    | 428.27 | 4    | 0.0033  | 0.00311  | 342.73 | 4     | 0.00413 | 0.00486 |
|   | <i>aqua-MIP</i> | 7     | 560    | 6    | 15    | 0.01093  | 0.00969 | 2    | 148.67 | 0    | 0       | 0        | 411.33 | 15    | 0.01488 | 0.0132  |
|   | Total           | –     | 5426   | 40   | 98    | –        | –       | 9    | 1939   | 15   | –       | –        | 3257   | 85    | –       | –       |
|   | Average         | 8.25  | 678.25 | 5    | 12.25 | 0.007503 | 0.00808 | 1.13 | 242.38 | 1.88 | 0.00302 | 0.003245 | 407.13 | 10.63 | 0.01024 | 0.01075 |

n, sample size;  $L$ , length in base pairs;  $S$ , number of segregating sites;  $\pi$ , nucleotide diversity;  $\theta_w$ , Watterson's parameter;  $R_m$ , the minimum number of recombinant events; NA: failed to be computed for lack of enough variation. The average values of all  $\theta_w$  and  $\pi$  here are weighted average values.  $N_h$  (Indels), number of haplotypes with indels included.

**Table S7** Migration rates among the four species implemented in LamarC 2.1.5.

| Migration rates ( <i>M</i> )                 | <i>P. sylvestris</i> var. <i>mongolica</i> | <i>P. densiflora</i> | <i>P. funebris</i> | <i>P. takahasii</i> |
|----------------------------------------------|--------------------------------------------|----------------------|--------------------|---------------------|
| > <i>P. sylvestris</i> var. <i>mongolica</i> | -                                          | 321                  | 473                | 257                 |
| > <i>P. densiflora</i>                       | 158                                        | -                    | 354                | 352                 |
| > <i>P. funebris</i>                         | 378                                        | 619                  | -                  | 273                 |
| > <i>P. takahasii</i>                        | 269                                        | 573                  | 482                | -                   |

>, migrate into the species.

**Table S8** The prior distributions of parameters used for description of the scenarios analysed in DIYABC v1.0.4.39 (Cornuet et al. 2010).

As the prior distributions of parameters often overlapped, several conditions were considered. They were  $t_4 > t_1$ ,  $t_3 \geq t_2$  and  $t_2 > t_1$ .

| Parameter                                        | Origin of <i>P. funebris</i> |           |           | Origin of <i>P. takahasii</i> |           |           |
|--------------------------------------------------|------------------------------|-----------|-----------|-------------------------------|-----------|-----------|
|                                                  | Distribution                 | Min.      | Max.      | Distribution                  | Min.      | Max.      |
| <b>Effective population size</b>                 |                              |           |           |                               |           |           |
| N1( <i>P. sylvestris</i> var. <i>mongolica</i> ) | uniform                      | 10        | 1000000   | uniform                       | 10        | 1000000   |
| N2( <i>P. densiflora</i> )                       | uniform                      | 10        | 1000000   | uniform                       | 10        | 1000000   |
| N3( <i>P. funebris</i> )                         | uniform                      | 10        | 500000    | –                             | –         | –         |
| N4( <i>P. takahasii</i> )                        | –                            | –         | –         | uniform                       | 10        | 500000    |
| Nm( <i>P. sylvestris</i> var. <i>mongolica</i> ) | uniform                      | 10        | 300000    | uniform                       | 10        | 300000    |
| Nd( <i>P. densiflora</i> )                       | uniform                      | 10        | 300000    | uniform                       | 10        | 300000    |
| NA                                               | uniform                      | 10        | 500000    | uniform                       | 10        | 500000    |
| <b>Time of events</b>                            |                              |           |           |                               |           |           |
| t1                                               | uniform                      | 1         | 3000      | uniform                       | 1         | 3000      |
| t2                                               | uniform                      | 1         | 10000     | uniform                       | 1         | 10000     |
| t3                                               | uniform                      | 1         | 10000     | uniform                       | 1         | 10000     |
| t4                                               | uniform                      | 1         | 100000    | uniform                       | 1         | 200000    |
| <b>Admixture rate</b>                            |                              |           |           |                               |           |           |
| r1/r2                                            | uniform                      | 0.001     | 0.999     | uniform                       | 0.001     | 0.999     |
| <b>Mean mutation rate</b>                        | uniform                      | $10^{-7}$ | $10^{-9}$ | uniform                       | $10^{-7}$ | $10^{-9}$ |

**Table S9** Estimations of the posterior distributions of parameters revealed from the Approximate Bayesian Computation for the best scenario for origin of *P. funebris* (scenario 1.1 in Table 6). The estimation is based on 1% of the closest simulated datasets and the logit transformation of parameters was used.

| Parameter | mean   | median | mode   | 95% CI        |
|-----------|--------|--------|--------|---------------|
| N1        | 530000 | 519000 | 293000 | 109000-977000 |
| N2        | 574000 | 596000 | 973000 | 84600-982000  |
| N3        | 239000 | 229000 | 123000 | 21800-486000  |
| Nm        | 86400  | 68300  | 40900  | 10600-260000  |
| Nd        | 116000 | 99800  | 57700  | 14600-279000  |
| NA        | 128000 | 98100  | 49600  | 14200-408000  |
| t1(kya)   | 35     | 33     | 9      | 2-73          |
| t2(kya)   | 114    | 110    | 90     | 23-220        |
| t3(kya)   | 180    | 190    | 247    | 68-248        |
| t4(kya)   | 1740   | 1850   | 2438   | 445-2470      |
| r1        | 0.345  | 0.318  | 0.267  | 0.0313-0.831  |

kya, thousand years ago.

**Table S10** Estimations of the posterior distributions of parameters revealed from the Approximate Bayesian Computation for the best scenario for origin of *P. takahashii* (scenario 2.1 in Table 6). The estimation is based on 1% of the closest simulated datasets and the logit transformation of parameters was used.

| Parameter | mean   | median | mode   | 95% CI        |
|-----------|--------|--------|--------|---------------|
| N1        | 522000 | 506000 | 389000 | 106000-971000 |
| N2        | 563000 | 582000 | 993000 | 74800-984000  |
| N4        | 254000 | 250000 | 111000 | 29300-488000  |
| Nm        | 95200  | 79100  | 62300  | 13600-266000  |
| Nd        | 112000 | 96000  | 59900  | 17100-275000  |
| NA        | 124000 | 98100  | 67900  | 12800-390000  |
| t1(kya)   | 36     | 35     | 12     | 2-73          |
| t2(kya)   | 115    | 112    | 92     | 23-220        |
| t3(kya)   | 179    | 189    | 245    | 64-247        |
| t4(kya)   | 1735   | 1845   | 2353   | 443-2470      |
| r2        | 0.202  | 0.169  | 0.155  | 0.0221-0.600  |

kya, thousand years ago.

**Figure S1** Schemes of the same six scenarios for origin of *P. funebris* and *P. takahashii*. Effective population sizes are marked in different colours and in the left, times of events (not to scale) are in the right. For the parameter codes see Table [S7](#).

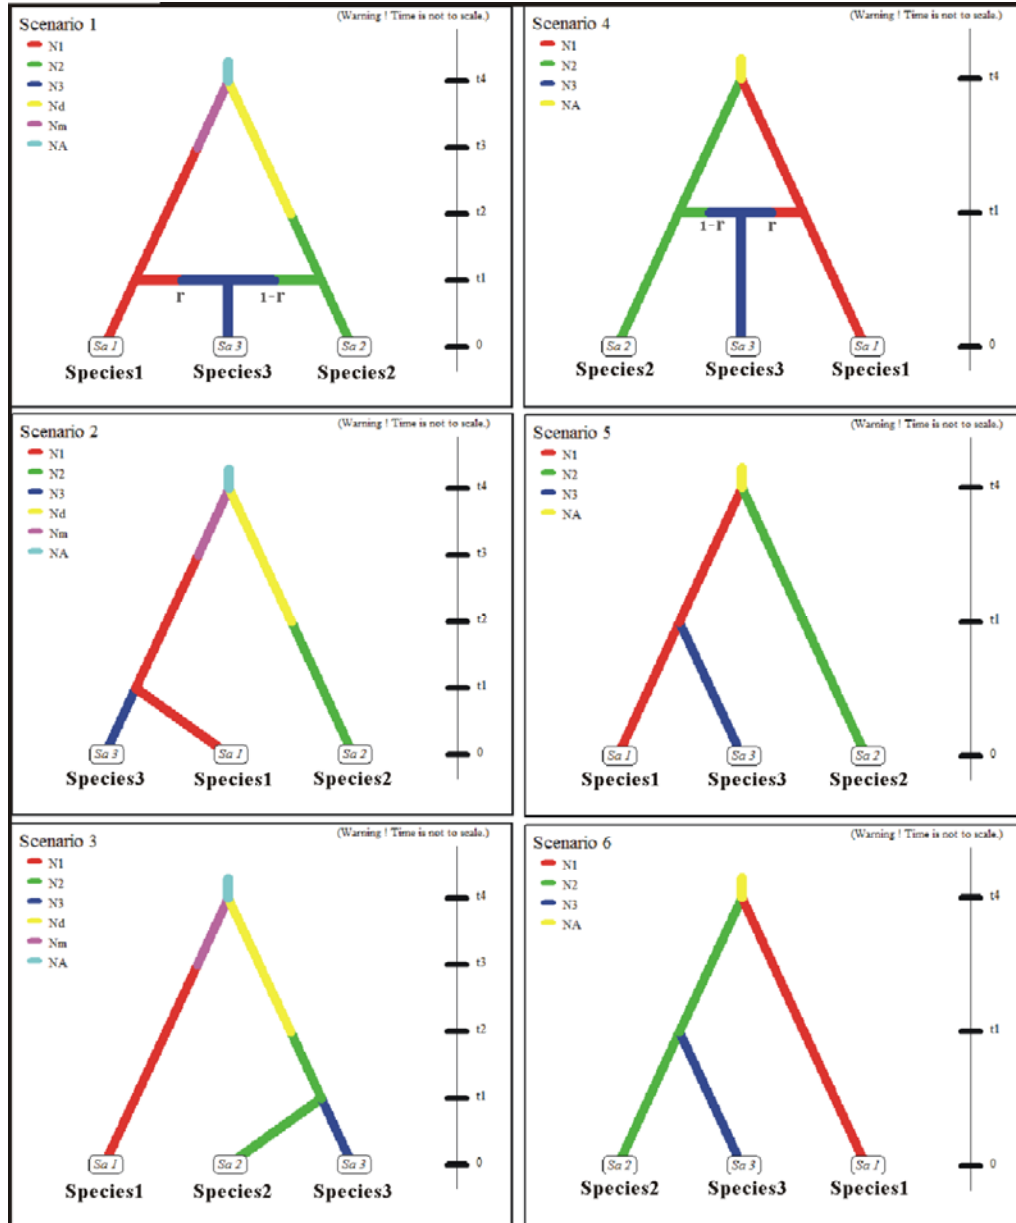



**Figure S2** Structure analysis of (a) *P. sylvestris* var. *mongolica*, (b) *P. funebris*, (c) *P. takahasii* and (d) *P. densiflora* when  $K=2-6$  clusters are assumed. For each  $K$  value, results of the run with the highest value of LnPD were used.

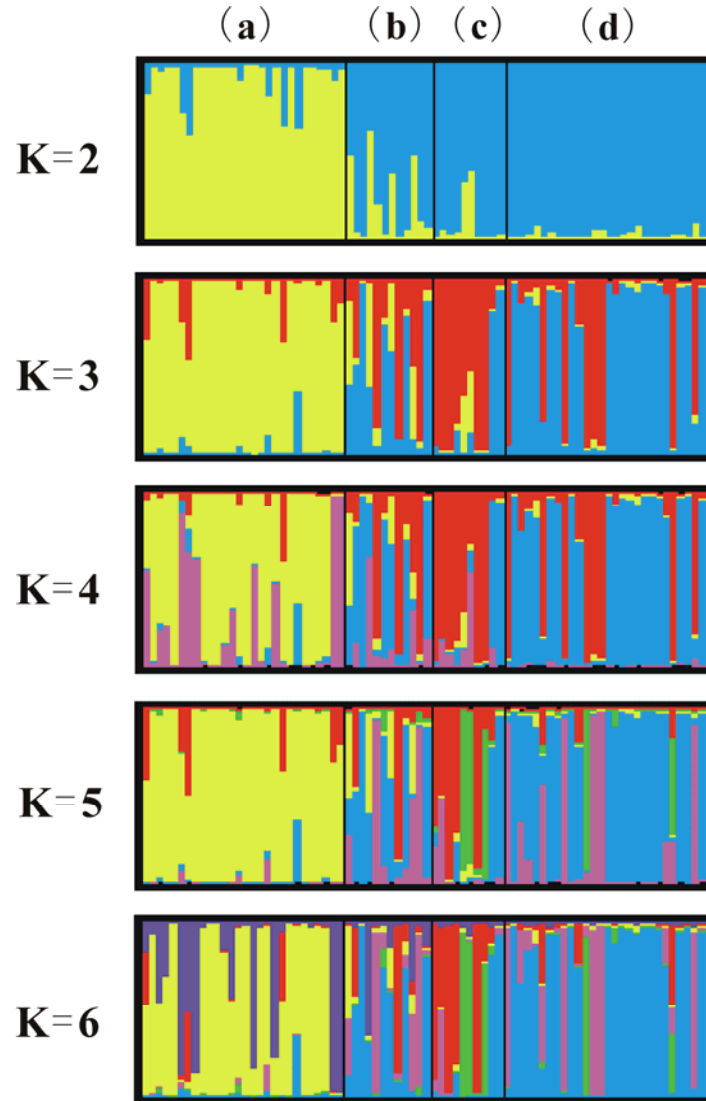

**Figure S3** Comparison of the relative posterior probabilities for scenarios separately for either of two origins. They are computed via the logistic regression in DIYABC v1.0.4.39 on 1% of simulated datasets closest to the observed data.

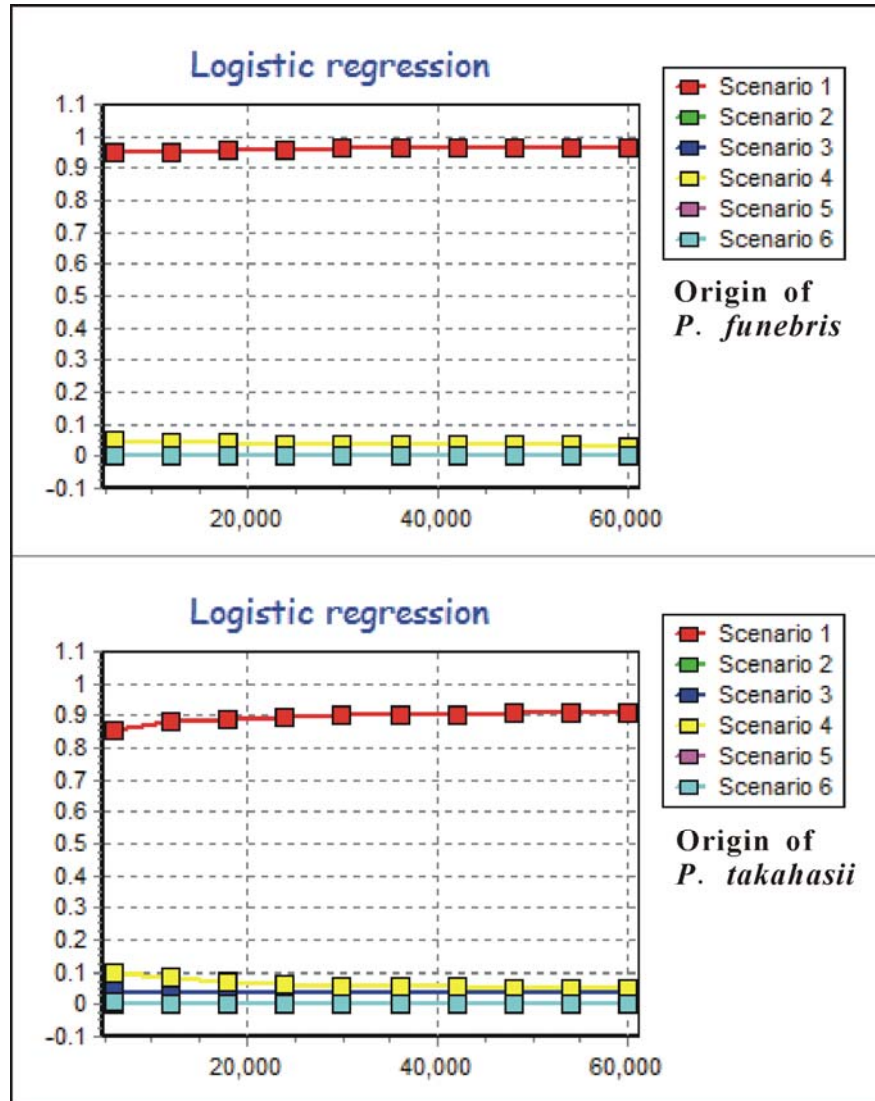

**Figure S4** Illustration explaining the scenario of the homoploid hybrid speciation as a result of range shifts. (a) Range contract to different refugia, (b) range expansion and secondary contact of *P. sylvestris* var. *mongolica* and *P. densiflora* which were indicated by the dark and light gray, respectively, (c) hybridizations between *P. sylvestris* var. *mongolica* and two different refugia of *P. densiflora*, and subsequent formation of two hybrid species, *P. funebris* and *P. takahasii*(oval area).

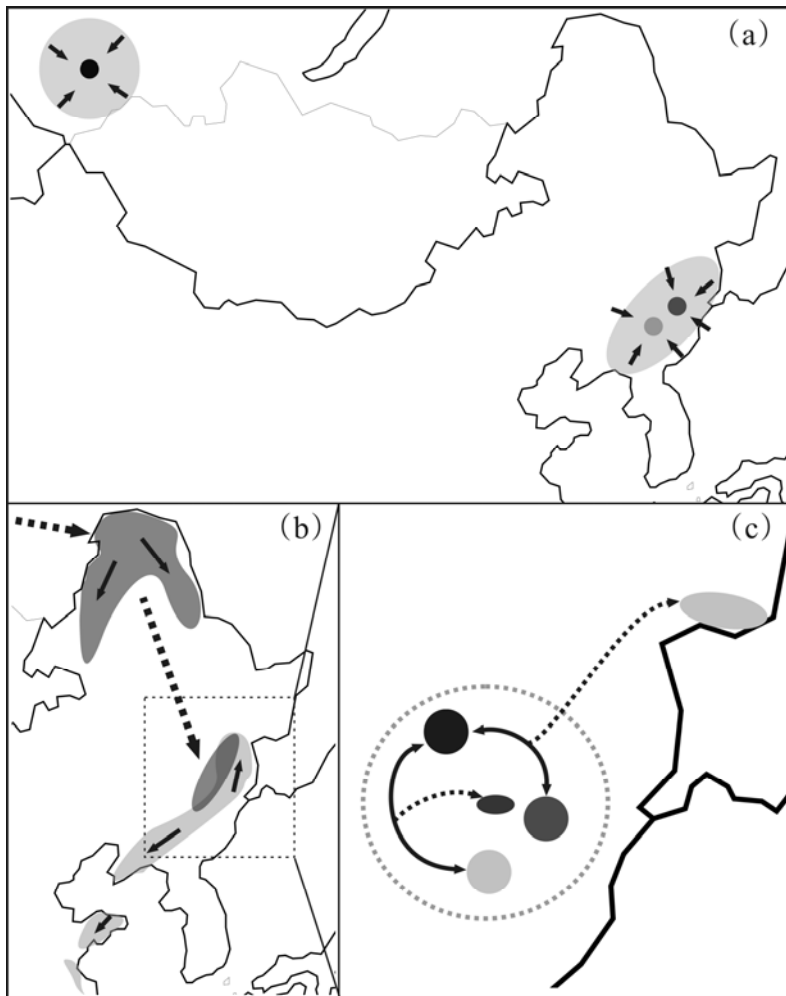

Supplement: hdy2011123x1.pdf [file hdy2011123x1.pdf]
